# Supplementary material for: Rare-earth-doped indium oxide nanosphere-based gas sensor for highly sensitive formaldehyde detection at a low temperature
Source: Royal Society of Chemistry journal article supplement (doi:10.1039/d2nr04972d), 2022-12-15
Supplement: d2nr04972d1.pdf [file d2nr04972d1.pdf]

## Supporting Information

### Rare earth doped indium oxide nanospheres based gas sensor for highly sensitive formaldehyde detection at low temperature

Xiangyun Ma<sup>a</sup>, Houjuan Zhu<sup>\*, b</sup>, Long Yu<sup>a</sup>, Xin Li<sup>a</sup>, Enyi Ye<sup>b, c</sup>, Zibiao Li<sup>b, c</sup>, Xian Jun Loh<sup>b</sup>, Suhua Wang<sup>\*, a</sup>

<sup>a</sup>Guangdong Provincial Key Laboratory of Petrochemical Pollution Process and Control, School of Environmental Science and Engineering, Guangdong University of Petrochemical Technology, Maoming, Guangdong 525000, China

<sup>b</sup>Institute of Materials Research and Engineering, A\*STAR (Agency for Science, Technology and Research), Singapore 138634, Singapore

<sup>c</sup>Institute of Sustainability for Chemicals, Energy and Environment (ISCE2) A\*STAR (Agency for Science, Technology and Research) Singapore 138634, Singapore

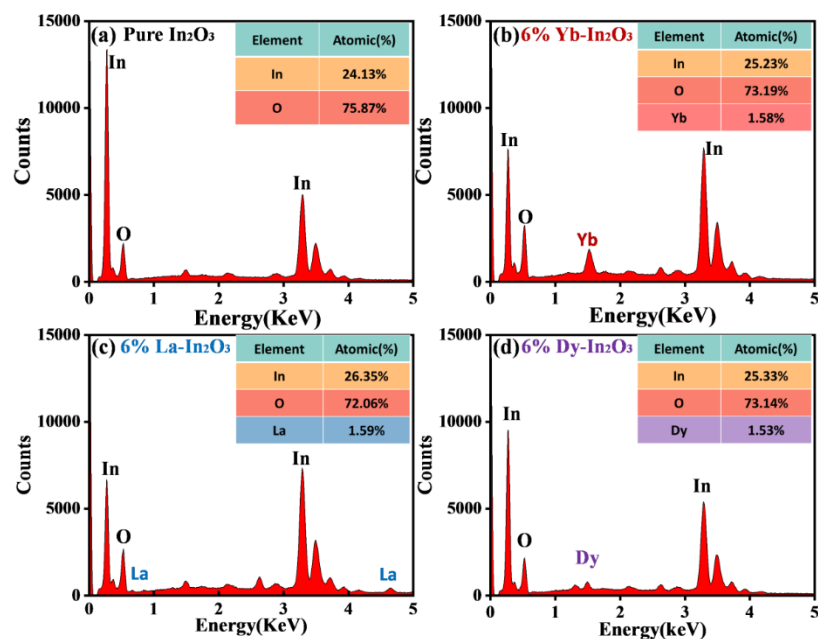

**Fig. S1** EDS spectrum of pure- $\text{In}_2\text{O}_3$  nanoflowers, Yb-doped  $\text{In}_2\text{O}_3$ , La-doped  $\text{In}_2\text{O}_3$ , and Dy-doped  $\text{In}_2\text{O}_3$  nanospheres.

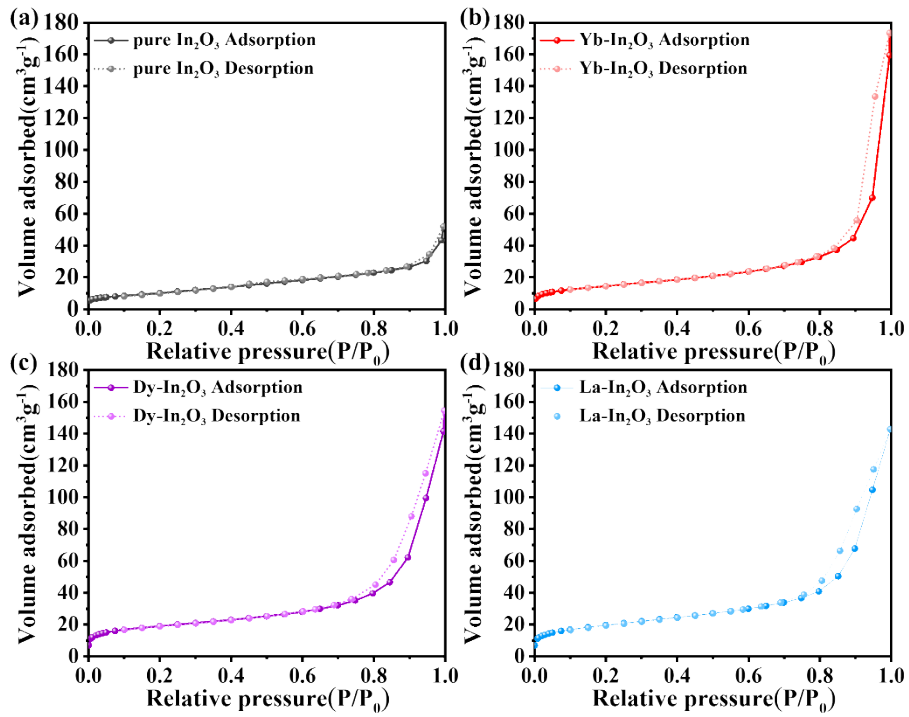

**Fig. S2** N<sub>2</sub> adsorption-desorption curves of pure In<sub>2</sub>O<sub>3</sub> nanoflowers, Yb-doped In<sub>2</sub>O<sub>3</sub>, Dy-doped In<sub>2</sub>O<sub>3</sub>, and La-doped In<sub>2</sub>O<sub>3</sub> nanospheres.

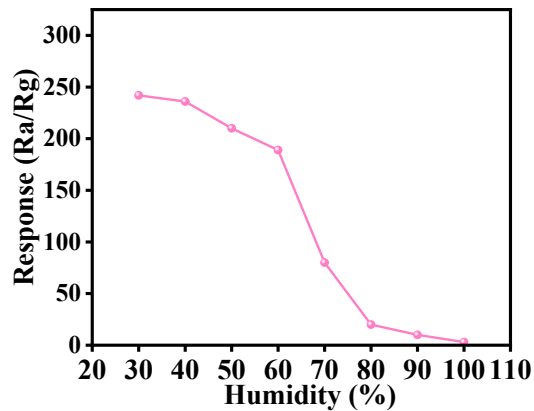

**Fig. S3** Responses of 6% La-In<sub>2</sub>O<sub>3</sub> sensor under different humidity conditions to 100 ppm of HCHO.

**Table S1.** Slopes and the R<sup>2</sup> values of correlation linear and TDL calculation for HCHO detection using RE-In<sub>2</sub>O<sub>3</sub>

| Sample                               | Slop      |             | R <sup>2</sup> |             | TDL (ppb) |
|--------------------------------------|-----------|-------------|----------------|-------------|-----------|
|                                      | 1-100 ppm | 100-300 ppm | 1-100 ppm      | 100-300 ppm |           |
| Pure In <sub>2</sub> O <sub>3</sub>  | 0.07281   | 0.03652     | 0.9868         | 0.9931      |           |
| 3% La-In <sub>2</sub> O <sub>3</sub> | 1.23196   | 1.58725     | 0.99917        | 0.9935      | 18.7      |
| 6% La-In <sub>2</sub> O <sub>3</sub> | 2.11012   | 1.27882     | 0.9997         | 0.9973      | 10.9      |
| 9% La-In <sub>2</sub> O <sub>3</sub> | 1.64475   | 0.8568      | 0.9971         | 0.9935      | 14.0      |
| 6% Yb-In <sub>2</sub> O <sub>3</sub> | 0.12654   | 0.06158     | 0.9719         | 0.9628      | 183       |
| 6% Dy-In <sub>2</sub> O <sub>3</sub> | 0.96265   | 0.50694     | 0.9855         | 0.9653      | 24.0      |
